# Supplementary material
Source: HighWire-hosted journal article supplement (https://www.cancerbiomed.org/content/j.issn.2095-3941.2023.0019)
Supplement: media-1 [file media-1.pdf]

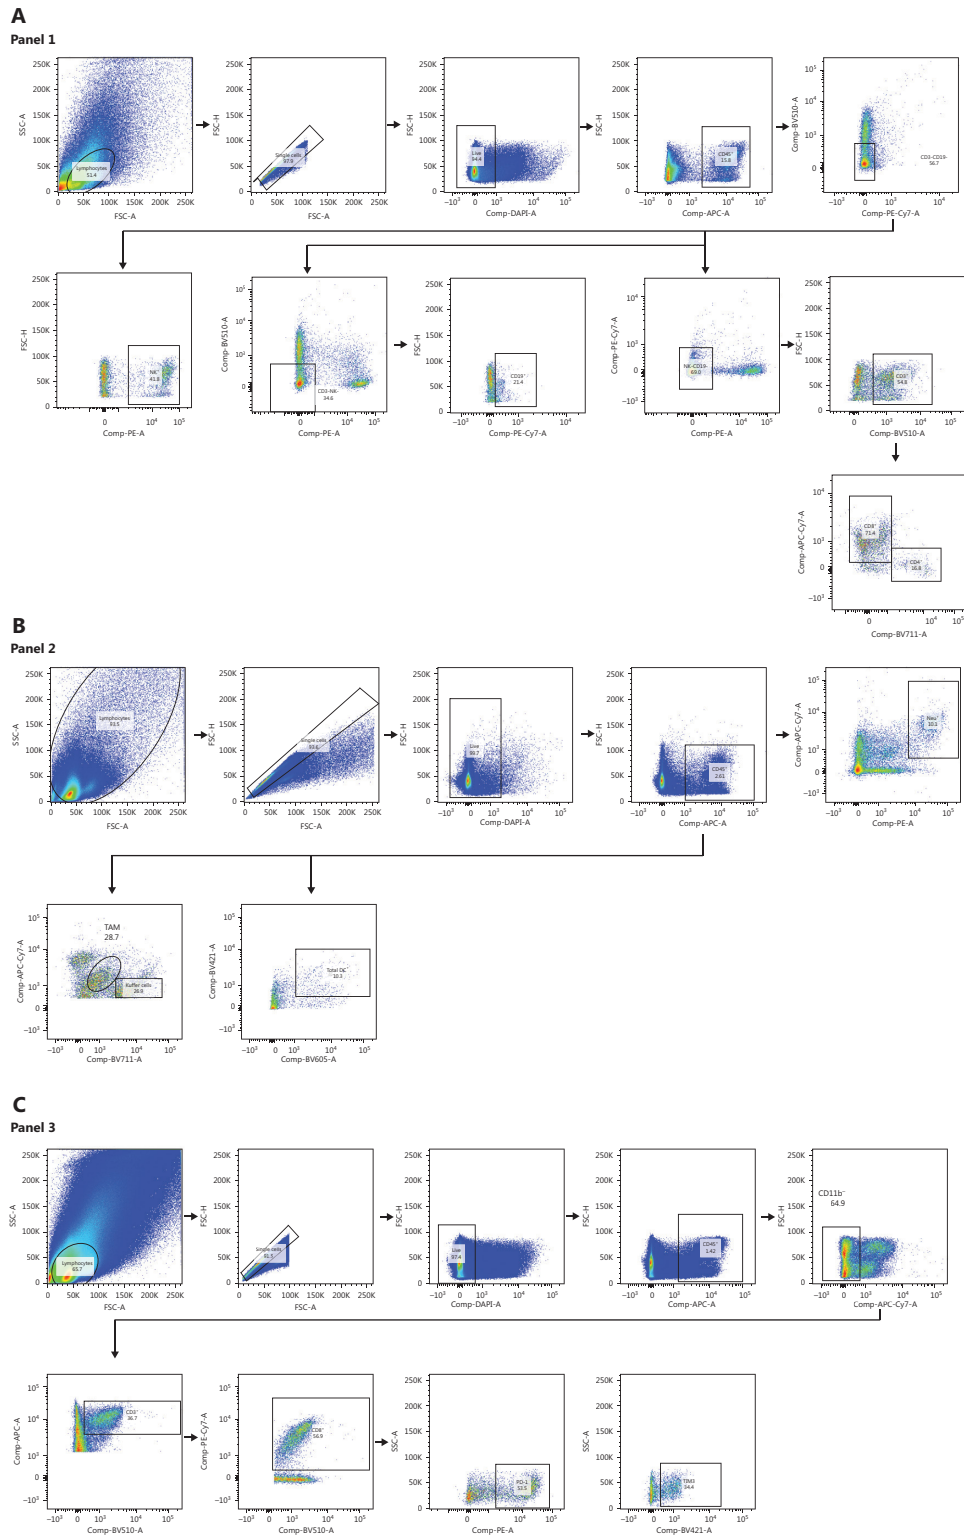

**Figure S2** (A) Gating strategy and illustrative plots of lymphoid cells of a representative sample. (B) Gating strategy and illustrative plots of myeloid cells of a representative sample. (C) Gating strategy and illustrative plots of CD8<sup>+</sup> T cells status of a representative sample.
